# Supplementary material for: Patterns in Genotype Composition of Indian Isolates of the Bombyx mori Nucleopolyhedrovirus and Bombyx mori Bidensovirus
Source: MDPI journal article supplement (doi:10.3390/v13050901), 2021-05-13
Supplement: s1 [file s1]

**Supplementary Material:**

1–50 nt CGATCCACGAACATCCACCTGATTACGAGTGTCTGTTAGGGGCTTATCAGC  
 51–100 nt TCCATGGGTTAATCTAGGTATAAGTCACGAAGCGACACCGAGAAGAGGCT  
 101–150 nt CAAGCCCCCAAATTCCATAAAGCTACGGAAGGGGACACCCTGGGCAGCG  
 151–200 nt ATGCGCAGGGTAGTCCGTTTTATATCATACGCGTCCGCGGTTAATATACT  
 201–250 nt ATTTGCATTTTCCACAACCTGTTGCATAGCGCGACGGCAGGCCCTTAGTA  
 251–300 nt CAGTTAGAGGAGATACAAGCCTGCACCCTGTTGCCCTACCATCTGATACG

**Figure S1.** Random 300 nt linker sequence that was used for concatenating VD1 and VD2 of BmBDV-Ja.

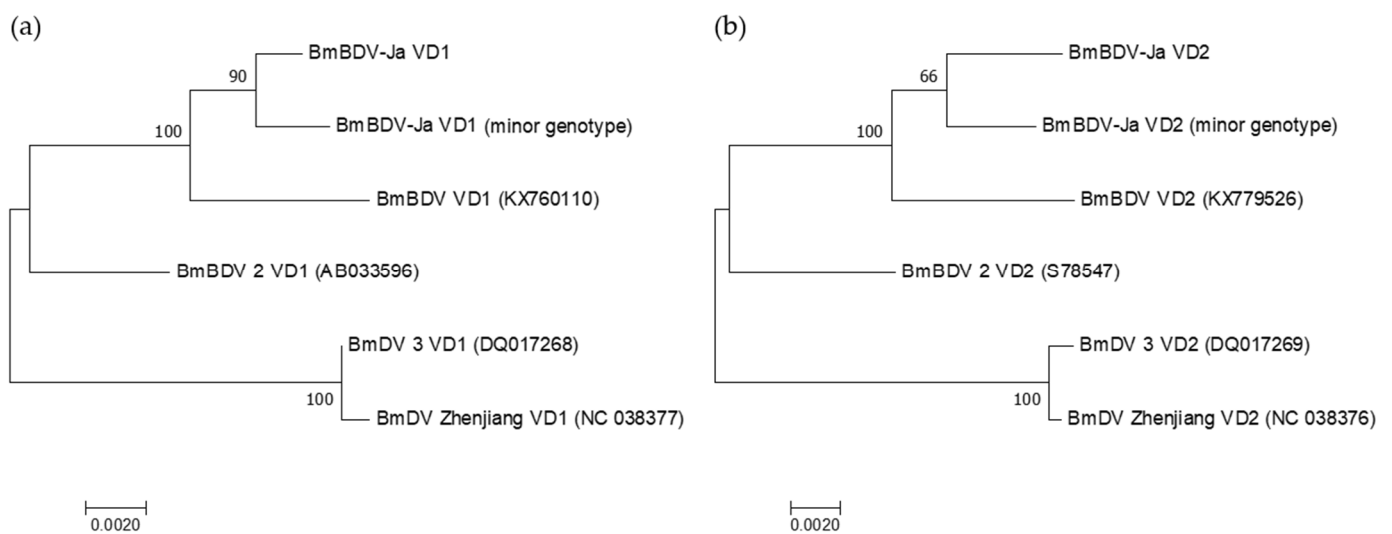

**Figure S2.** Maximum likelihood tree of the (a) VD1 and (b) VD2 genome molecules of BmBDV-Ja in comparison to BmBDV, BmBDV2, BmDV 3 and BmDV Zhenjiang (for details see Figure 6). The BmBDV-Ja (minor genotype) consensus sequence included all variable SNPs that were detected in the BmBDV-Ja based SNP analysis with a frequency  $f > 10\%$ .

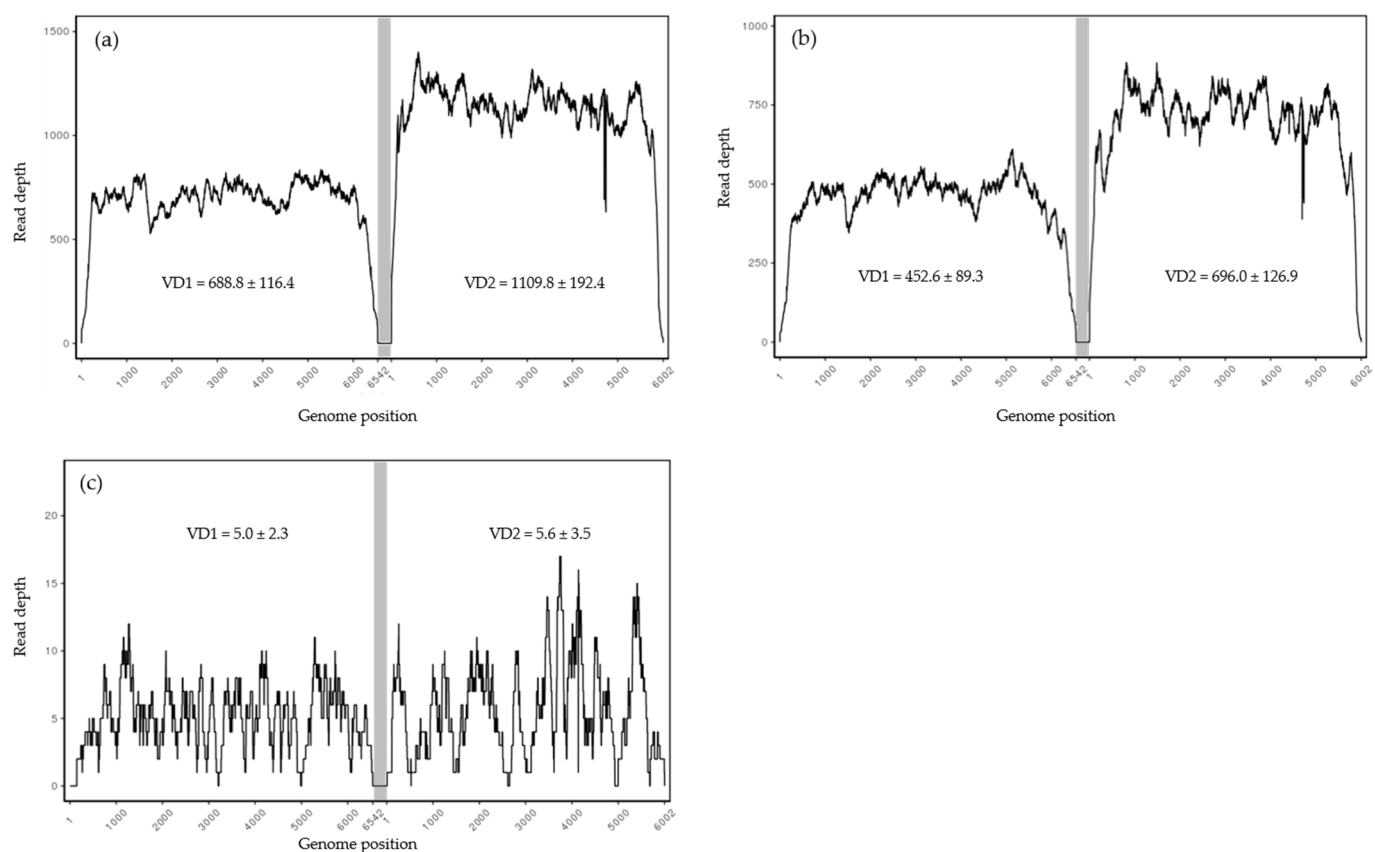

**Figure S3.** Read depth of the BmBDV alignments created from the sequenced (a) BmNPV-My, (b) BmNPV-De and (c) BmBDV-Ja samples. Both genome molecules (VD1 and VD2) of the bipartite BmBDV-Ja genome were concatenated by a 300 nt random spacer sequence (Figure S1) marked by a vertical grey box, resulting in a single genome molecule that was used as reference sequence. From the aligned reads, the mean read depth  $\pm$  standard deviation were calculated separately for VD1 and VD2.

**Table S1.** Open reading frames (ORF), features and nucleotide (nt) and amino acid (aa) similarity in comparison to the BmNPV-India (JQ991010) isolate.

| ORF         | Feature                     | Start | End     | Length (nt) | nt identity (%) | aa identity (%) |
|-------------|-----------------------------|-------|---------|-------------|-----------------|-----------------|
| <i>bm1</i>  | <i>polh</i>                 | 1     | > 738   | 738         | 100             | 100             |
| <i>bm2</i>  | <i>orf1629</i>              | 768   | < 2411  | 1644        | 98.97           | 99.1            |
| <i>bm3</i>  | <i>pk1</i>                  | 2410  | > 3240  | 831         | 99.28           | 99.3            |
| <i>bm4</i>  | <i>hypothetical protein</i> | 3266  | < 4288  | 1023        | 99.61           | 100             |
| <i>bm5</i>  | <i>hypothetical protein</i> | 4630  | < 5625  | 996         | 99.6            | 99.7            |
| <i>bm6</i>  | <i>lef-1</i>                | 5505  | < 6317  | 813         | 99.88           | 100             |
| <i>bm7</i>  | <i>egt</i>                  | 6432  | > 7952  | 1521        | 99.41           | 98.4            |
| <i>bm8</i>  | <i>odv-e26</i>              | 8094  | > 8783  | 690         | 99.13           | 98.7            |
| <i>bm9</i>  | <i>hypothetical protein</i> | 8752  | > 9384  | 633         | 99.37           | 99.5            |
| <i>bm10</i> | <i>hypothetical protein</i> | 9414  | < 10484 | 1071        | 99.16           | 98.6            |
| <i>bm11</i> | <i>hypothetical protein</i> | 10486 | > 10818 | 333         | 99.4            | 100             |
| <i>bm12</i> | <i>airf-1</i>               | 11001 | < 12347 | 1347        | 99.03           | 98.7            |
| <i>bm13</i> | <i>pif-2</i>                | 12384 | > 13532 | 1149        | 99.65           | 99.5            |
| <i>bm14</i> | <i>f-protein</i>            | 13635 | > 15656 | 2022        | 99.95           | 99.9            |
| <i>bm15</i> | <i>pkip</i>                 | 15687 | < 16196 | 510         | 99.22           | 100             |
| <i>bm16</i> | <i>dbp</i>                  | 16236 | < 17192 | 957         | 99.58           | 99.7            |
| <i>bm17</i> | <i>hypothetical protein</i> | 17268 | > 17657 | 390         | 100             | 100             |
| <i>bm18</i> | <i>iap1</i>                 | 17659 | > 18534 | 876         | 99.2            | 99.3            |
| <i>bm19</i> | <i>lef-6</i>                | 18539 | > 19060 | 522         | 100             | 100             |
| <i>bm20</i> | <i>hypothetical protein</i> | 19183 | < 19398 | 216         | 100             | 100             |
| <i>bm21</i> | <i>hypothetical protein</i> | 19454 | < 20872 | 1419        | 99.72           | 99.6            |
| <b>bm22</b> | <i>bro-a</i>                | 20907 | < 21878 | 972         | 94.66           | 93.6            |
| <b>bm23</b> | <i>sod</i>                  | 22056 | > 22511 | 456         | 100             | 100             |
|             | <i>hr1</i>                  | 22607 | 23482   |             |                 |                 |
| <b>bm24</b> | <i>fgf</i>                  | 23540 | > 24088 | 549         | 99.64           | 100             |
|             | <i>hr2</i>                  | 24148 | 24336   |             |                 |                 |
| <b>bm25</b> | <i>hypothetical protein</i> | 24401 | < 25048 | 648         | 100             | 100             |
| <i>bm26</i> | <i>ubiquitin</i>            | 25069 | > 25302 | 234         | 99.57           | 100             |
| <i>bm27</i> | <i>39k</i>                  | 25352 | < 26188 | 837         | 100             | 100             |
| <i>bm28</i> | <i>lef-11</i>               | 26182 | < 26520 | 339         | 100             | 100             |
| <i>bm29</i> | <i>bv-e31</i>               | 26483 | < 27136 | 654         | 99.54           | 100             |
| <i>bm30</i> | <i>p43</i>                  | 27204 | < 28292 | 1089        | 99.63           | 99.4            |
| <i>bm31</i> | <i>p47</i>                  | 28300 | < 29499 | 1200        | 99.75           | 99.7            |
| <i>bm32</i> | <i>lef-12</i>               | 29504 | > 30037 | 534         | 99.06           | 97.2            |
| <i>bm33</i> | <i>gta</i>                  | 30112 | > 31632 | 1521        | 99.34           | 99.2            |
| <i>bm34</i> | <i>hypothetical protein</i> | 31646 | > 31882 | 237         | 100             | 100             |
| <i>bm35</i> | <i>hypothetical protein</i> | 31863 | > 32258 | 396         | 98.74           | 100             |
| <i>bm36</i> | <i>hypothetical protein</i> | 32260 | > 32844 | 585         | 98.97           | 99              |
| <i>bm37</i> | <i>odv-e66</i>              | 32829 | > 34955 | 2127        | 99.86           | 99.9            |

| ORF  | Feature                     | Start | End     | Length (nt) | nt identity (%) | aa identity (%) |
|------|-----------------------------|-------|---------|-------------|-----------------|-----------------|
| bm38 | <i>ets</i>                  | 35055 | < 35324 | 270         | 99.63           | 98.9            |
| bm39 | <i>lef-8</i>                | 35574 | < 38177 | 2604        | 99.77           | 100             |
| bm40 | <i>hypothetical protein</i> | 38234 | > 39193 | 960         | 99.69           | 100             |
| bm41 | <i>hypothetical protein</i> | 39184 | < 39768 | 585         | 98.97           | 97.9            |
| bm42 | <i>hypothetical protein</i> | 39770 | > 40189 | 420         | 100             | 100             |
| bm43 | <i>lef-10</i>               | 40186 | > 40422 | 237         | 100             | 100             |
| bm44 | <i>vp1054</i>               | 40280 | > 41377 | 1098        | 100             | 100             |
| bm45 | <i>hypothetical protein</i> | 41459 | > 41680 | 222         | 94.02           | 93.5            |
| bm46 | <i>hypothetical protein</i> | 41682 | > 41936 | 255         | 100             | 100             |
| bm47 | <i>hypothetical protein</i> | 42190 | > 42675 | 486         | 99.59           | 99.4            |
| bm48 | <i>hypothetical protein</i> | 42690 | < 43205 | 516         | 100             | 100             |
| bm49 | <i>ac60</i>                 | 43217 | < 43465 | 249         | 100             | 100             |
| bm50 | <i>fp25</i>                 | 43611 | < 44255 | 645         | 100             | 100             |
| bm51 | <i>lef-9</i>                | 44359 | > 45831 | 1473        | 99.86           | 100             |
| bm52 | <i>hypothetical protein</i> | 45892 | > 46359 | 468         | 99.57           | 100             |
| bm53 | <i>gp37</i>                 | 46433 | < 47317 | 885         | 98.87           | 97.6            |
| bm54 | <i>dnapol</i>               | 47447 | < 50413 | 2967        | 99.73           | 100             |
| bm55 | <i>hypothetical protein</i> | 50422 | > 52839 | 2418        | 99.83           | 99.9            |
| bm56 | <i>lef-3</i>                | 52842 | < 53999 | 1158        | 100             | 100             |
| bm57 | <i>odv-nc42</i>             | 54018 | > 54422 | 405         | 100             | 100             |
| bm58 | <i>hypothetical protein</i> | 54400 | > 55188 | 789         | 100             | 100             |
| bm59 | <i>iap2</i>                 | 55355 | > 56104 | 750         | 99.87           | 100             |
| bm60 | <i>hypothetical protein</i> | 56163 | > 56345 | 183         | 100             | 100             |
| bm61 | <i>hypothetical protein</i> | 56356 | < 56655 | 300         | 100             | 100             |
| bm62 | <i>hypothetical protein</i> | 56652 | < 57461 | 810         | 99.88           | 100             |
| bm63 | <i>hypothetical protein</i> | 57479 | < 57880 | 402         | 99              | 99.2            |
| bm64 | <i>hypothetical protein</i> | 57899 | < 58156 | 258         | 100             | 100             |
| bm65 | <i>vlf-1</i>                | 58172 | < 59326 | 1155        | 98.1            | 97.9            |
| bm66 | <i>hypothetical protein</i> | 59332 | < 59664 | 333         | 99.7            | 99.1            |
| bm67 | <i>hypothetical protein</i> | 59667 | < 59981 | 315         | 100             | 100             |
| bm68 | <i>gp41</i>                 | 59984 | < 61189 | 1206        | 99.67           | 99.8            |
| bm69 | <i>hypothetical protein</i> | 61179 | < 61886 | 708         | 99.72           | 100             |
| bm70 | <i>hypothetical protein</i> | 61729 | < 62277 | 549         | 100             | 100             |
| bm71 | <i>p95</i>                  | 62243 | > 64756 | 2514        | 99.64           | 99.6            |
|      | <i>hr3</i>                  | 64778 | 66264   |             |                 |                 |
| bm72 | <i>vp15</i>                 | 66308 | > 66688 | 381         | 99.48           | 100             |
| bm73 | <i>cg30</i>                 | 66693 | < 67493 | 801         | 99.25           | 98.9            |
| bm74 | <i>vp39</i>                 | 67496 | < 68542 | 1047        | 100             | 100             |
| bm75 | <i>lef-4</i>                | 68561 | > 69958 | 1398        | 99.64           | 100             |
| bm76 | <i>hypothetical protein</i> | 69955 | < 70416 | 462         | 99.78           | 99.3            |
| bm77 | <i>p33</i>                  | 70452 | < 71231 | 780         | 99.62           | 100             |
| bm78 | <i>hypothetical protein</i> | 71230 | > 71715 | 486         | 99.59           | 100             |

| ORF   | Feature              | Start  | End      | Length (nt) | nt identity (%) | aa identity (%) |
|-------|----------------------|--------|----------|-------------|-----------------|-----------------|
| bm79  | odv-e25              | 71724  | > 72410  | 687         | 100             | 100             |
| bm80  | dna helicase         | 72449  | < 76117  | 3669        | 99.78           | 100             |
| bm81  | odv-e28              | 76104  | > 76625  | 522         | 98.28           | 97.7            |
| bm82  | bro-b                | 76740  | > 77465  | 726         | n.a.            | n.a.            |
| bm83  | bro-c                | 77524  | < 78522  | 999         | 93.29           | 92.5            |
| bm84  | 38k                  | 78665  | < 79627  | 963         | 99.58           | 99.4            |
| bm85  | lef-5                | 79562  | < 80359  | 798         | 99.62           | 99.6            |
| bm86  | p6.9                 | 80356  | < 80553  | 198         | 100             | 100             |
| bm87  | p40                  | 80595  | < 81686  | 1092        | 99.91           | 100             |
| bm88  | p12                  | 81706  | < 82083  | 378         | 100             | 100             |
| bm89  | p45                  | 82064  | < 83227  | 1164        | 99.48           | 99.7            |
| bm90  | vp80                 | 83253  | < 85337  | 2085        | 99.62           | 99              |
| bm91  | he65                 | 85360  | < 86229  | 870         | 99.43           | 99.3            |
|       | hr4L                 | 86250  | 86846    |             |                 |                 |
| bm92  | hypothetical protein | 86863  | < 87609  | 747         | 99.33           | 98.8            |
| bm93  | hypothetical protein | 87610  | < 87927  | 318         | 100             | 100             |
| bm94  | hypothetical protein | 87942  | < 89117  | 1176        | 99.4            | 99.5            |
| bm95  | hypothetical protein | 89141  | < 89320  | 180         | 100             | 100             |
| bm96  | hypothetical protein | 89369  | < 89572  | 204         | 100             | 100             |
|       | hr4R                 | 89715  | 90241    |             |                 |                 |
| bm97  | hypothetical protein | 90246  | < 91520  | 1275        | 99.76           | 99.7            |
| bm98  | pif-3                | 92155  | < 91535  | 614         | 99.84           | 99.5            |
| bm99  | hypothetical protein | 92333  | < 92163  | 185         | 94.05           | 89.5            |
| bm100 | hypothetical protein | 92269  | < 92556  | 288         | 99.65           | 100             |
| bm101 | pif-1                | 92688  | < 94271  | 1584        | 99.62           | 99.4            |
| bm102 | hypothetical protein | 94279  | < 94527  | 249         | 100             | 100             |
| bm103 | hypothetical protein | 94630  | < 94803  | 174         | 100             | 100             |
| bm104 | hypothetical protein | 94696  | < 94881  | 186         | 100             | 100             |
| bm105 | gcn2                 | 94915  | < 95592  | 678         | 99.56           | 99.1            |
| bm106 | hypothetical protein | 95776  | < 96510  | 735         | 99.05           | 98.8            |
| bm107 | lef-7                | 96529  | < 97212  | 684         | 98.68           | 97.8            |
| bm108 | chitinase            | 97202  | < 98857  | 1656        | 99.64           | 99.6            |
| bm109 | v-cath               | 98904  | < 99875  | 972         | 99.9            | 100             |
| bm110 | gp64                 | 99993  | < 101585 | 1593        | 100             | 100             |
| bm111 | p24                  | 101713 | < 102300 | 588         | 99.83           | 100             |
| bm112 | gp16                 | 102331 | < 102651 | 321         | 100             | 100             |
| bm113 | pp34                 | 102713 | < 103660 | 948         | 99.79           | 99.7            |
| bm114 | hypothetical protein | 103663 | < 104325 | 663         | 99.55           | 99.5            |
| bm115 | alkexo               | 104353 | < 105615 | 1263        | 99.52           | 99.5            |
| bm116 | p35                  | 106082 | < 106981 | 900         | 100             | 100             |
|       | hr5                  | 107030 | 107914   |             |                 |                 |
| bm117 | p26                  | 107971 | < 108693 | 723         | 100             | 100             |

| ORF          | Feature                     | Start  | End      | Length (nt) | nt identity (%) | aa identity (%) |
|--------------|-----------------------------|--------|----------|-------------|-----------------|-----------------|
| <i>bm118</i> | <i>p10</i>                  | 108766 | < 108978 | 213         | 99.53           | 100             |
| <i>bm119</i> | <i>p74</i>                  | 109053 | < 110990 | 1938        | 99.79           | 99.5            |
| <i>bm120</i> | <i>me53</i>                 | 111187 | < 112542 | 1356        | 99.48           | 99.1            |
| <i>bm121</i> | <i>hypothetical protein</i> | 112688 | < 112891 | 204         | 100             | 100             |
| <i>bm122</i> | <i>ie-0</i>                 | 112819 | < 113604 | 786         | 99.62           | 100             |
| <i>bm123</i> | <i>odv-nc50</i>             | 113619 | < 115049 | 1431        | 99.86           | 99.8            |
| <i>bm124</i> | <i>odv-e18</i>              | 115060 | < 115368 | 309         | 100             | 100             |
| <i>bm125</i> | <i>odv-ec27</i>             | 115383 | < 116255 | 873         | 99.89           | 100             |
| <i>bm126</i> | <i>hypothetical protein</i> | 116270 | < 116557 | 288         | 100             | 100             |
| <i>bm127</i> | <i>hypothetical protein</i> | 116552 | < 117157 | 606         | 99.67           | 100             |
| <i>bm128</i> | <i>ie-1</i>                 | 117223 | < 118977 | 1755        | 99.83           | 100             |
| <i>bm129</i> | <i>odv-e56</i>              | 119093 | < 120223 | 1131        | 99.29           | 98.7            |
| <i>bm130</i> | <i>hypothetical protein</i> | 120252 | < 120572 | 321         | 100             | 100             |
| <i>bm131</i> | <i>hypothetical protein</i> | 120541 | < 120858 | 318         | 100             | 100             |
| <i>bm132</i> | <i>ie-2</i>                 | 120891 | < 122168 | 1278        | 98.51           | 98.4            |
| <i>bm133</i> | <i>pe38</i>                 | 122654 | < 123583 | 930         | 100             | 100             |
| <i>bm134</i> | <i>hypothetical protein</i> | 123688 | < 123924 | 237         | 99.58           | 100             |
|              | <i>hr6</i>                  | 123929 | 124392   |             |                 |                 |
| <i>bm135</i> | <i>ptp</i>                  | 124403 | < 124909 | 507         | 99.21           | 98.8            |
| <i>bm136</i> | <i>bro-d</i>                | 124906 | < 125952 | 1047        | 94.57           | 92.6            |
| <i>bm137</i> | <i>hypothetical protein</i> | 126026 | < 126481 | 456         | 99.12           | 99.3            |
| <i>bm138</i> | <i>hypothetical protein</i> | 126510 | < 126839 | 330         | 99.39           | 99.1            |
| <i>bm139</i> | <i>lef-2</i>                | 126820 | < 127452 | 633         | 99.53           | 99.5            |
